# Supplementary material for: Endothelial to mesenchymal Notch signaling regulates skeletal repair
Source: JCI journal article supplement (doi:10.1172/jci.insight.181073), 2024-05-23
Supplement: sd1 [file 1]

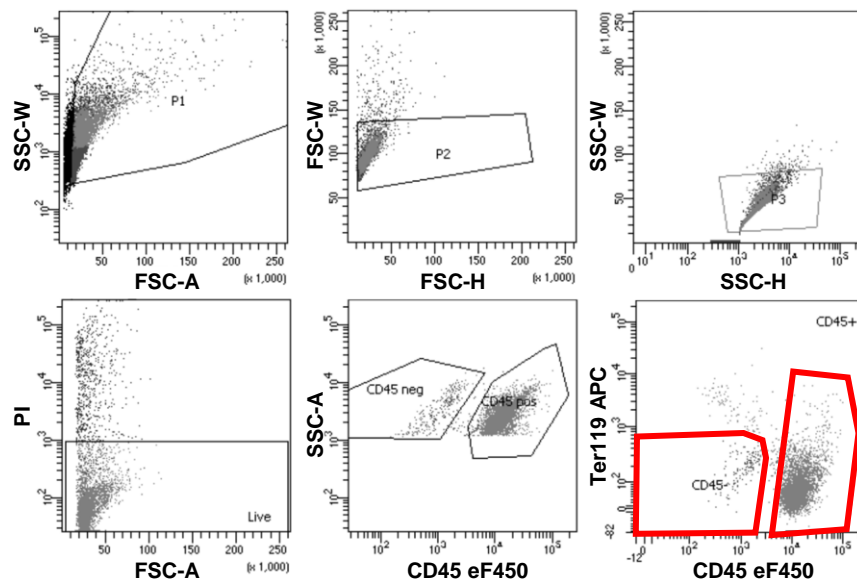

**Supplemental Figure 1. Gating strategy for sorting to collect cells for scRNA-seq.** Samples were stained for CD45 and Terr119 and sorted using a BD FACSSymphony™ S6 Cell Sorter. Live, single cells negative for CD45<sup>-</sup> were collected to identify non-hematopoietic cells within periosteal samples, or CD45<sup>+</sup> cells were collected as hematopoietic cells.

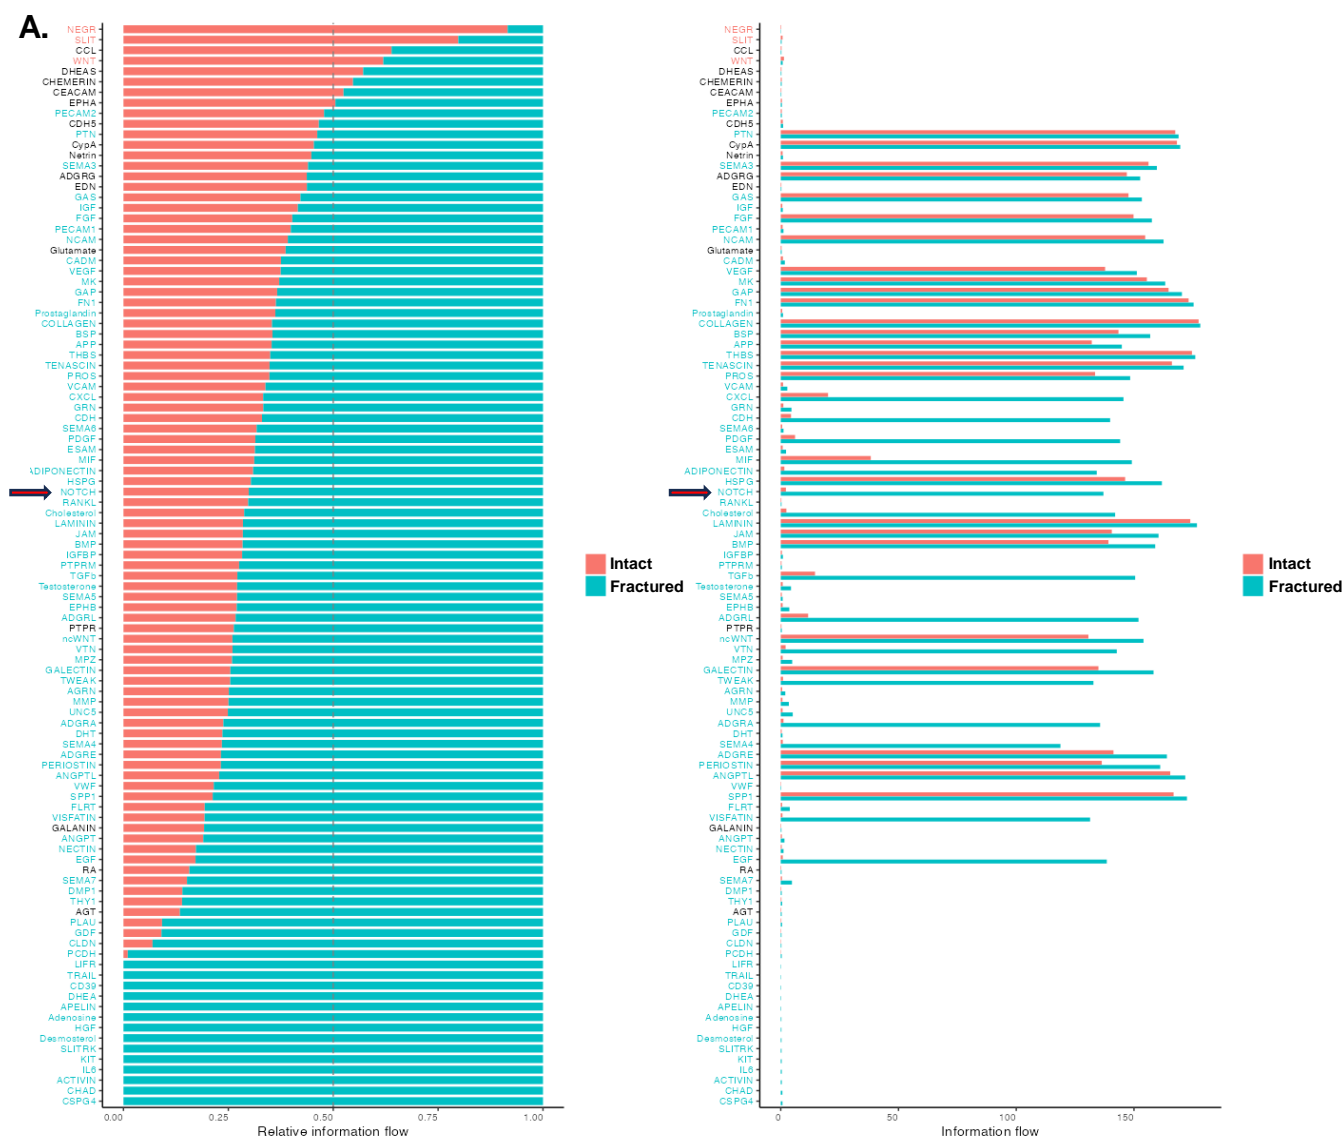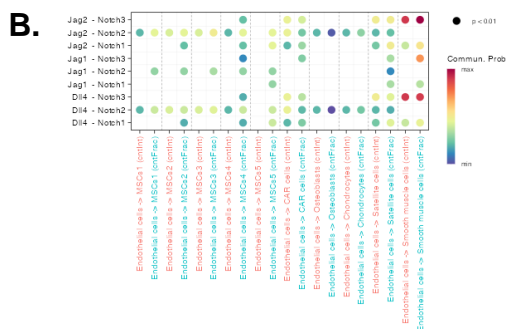

**Supplemental Figure 2. Cell - cell interactions evaluated by CellChat (version 2.1.2).**  
**(A)** Analysis of conserved and context-specific signaling pathways in Cre- intact sample compared to fractured Cre-. **(B)** Notch interactions of endothelial cells with mesenchymal clusters of Cre- intact and Cre- fractured sample.

**A.**

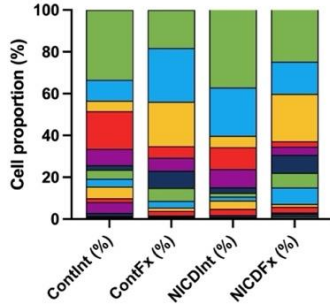

**B.**

| Cluster | Contint (%) | ContFx (%) | NICDint (%) | NICDFx (%) |
|---------|-------------|------------|-------------|------------|
| 0       | 33.38       | 18.25      | 37.08       | 24.69      |
| 1       | 9.99        | 25.6       | 23.1        | 15.45      |
| 2       | 5           | 21.27      | 5.46        | 22.65      |
| 3       | 18.09       | 5.5        | 10.52       | 2.56       |
| 4       | 7.75        | 6.27       | 8.66        | 3.98       |
| 5       | 2.16        | 8.13       | 2.63        | 8.53       |
| 6       | 4.33        | 6.29       | 1.87        | 7          |
| 7       | 3.79        | 3.27       | 1.84        | 7.92       |
| 8       | 5.57        | 1.46       | 4           | 1.38       |
| 9       | 1.8         | 2.29       | 2.94        | 2.74       |
| 10      | 5.19        | 0.31       | 0.04        | 0.53       |
| 11      | 1.44        | 0.42       | 0.83        | 1.28       |
| 12      | 0.4         | 0.33       | 0.34        | 0.78       |
| 13      | 0.52        | 0.19       | 0.31        | 0.16       |
| 14      | 0.36        | 0.29       | 0.25        | 0.17       |
| 15      | 0.23        | 0.13       | 0.14        | 0.19       |

- 0 Endothelial cells
- 1 MSCs1
- 2 MSCs2
- 3 Cluster 3
- 4 MSCs3
- 5 Satellite cells
- 6 MSCs4
- 7 MSCs5
- 8 Chondrocytes
- 9 Smooth muscle cells
- 10 Cluster 10
- 11 CAR cells
- 12 Osteoblasts
- 13 Cluster 13
- 14 Cluster 14
- 15 Cluster 15

**Supplemental Figure 3. (A)** Proportion of cells within the Cre- and Cre+ intact and fractured samples of each cluster with numerical representation of cell frequency **(B)**

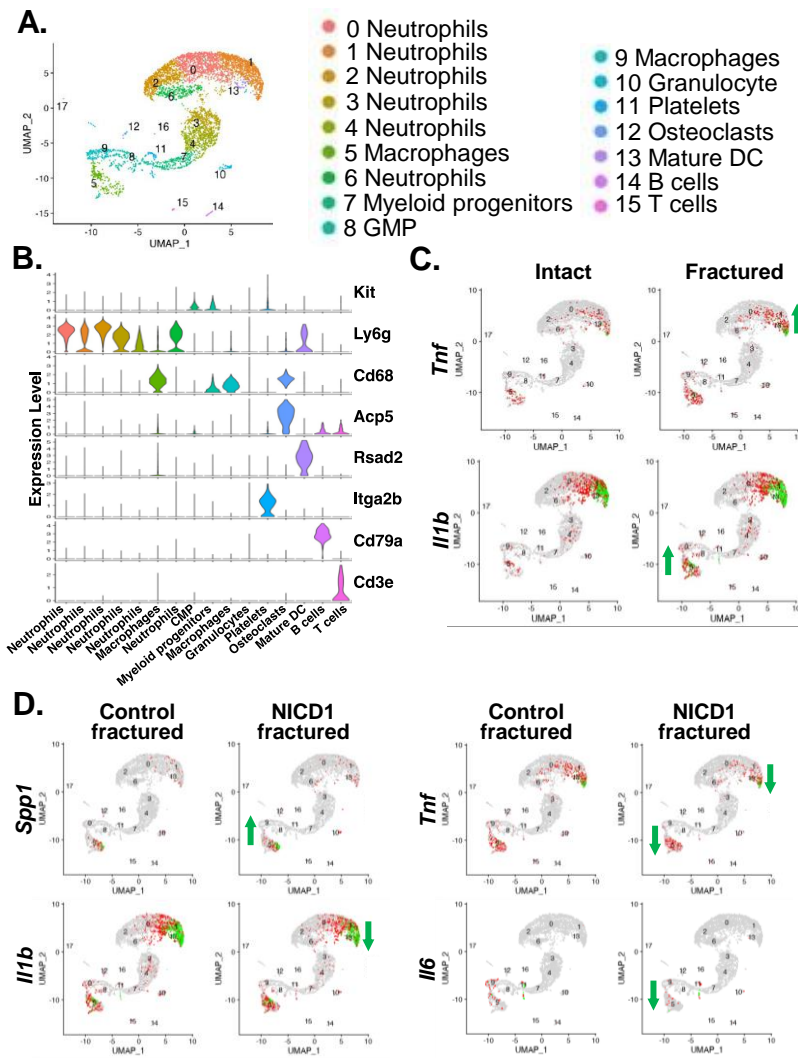

**Supplemental Figure 4. Notch1 activation in osteoprogenitor cells decreases the proinflammatory transcriptional profile of hematopoietic cells.** (A) Sorted CD45<sup>+</sup> cells were analyzed by 10X Genomics to determine transcriptional changes in the periosteum of intact and fractured control and in samples with NICD1 overexpression. Clusters were determined by unsupervised clustering using the Seurat package (version 4). (B) Violin plots of conserved genes within the clusters of hematopoietic cell populations. (C) We determined increased expression of *Tnf* and *Il1b* in neutrophils and macrophages upon femur fracture. (D) Cre<sup>+</sup>  $\alpha$ SMACreER/NICD1 animals exhibited a significant decrease in the proinflammatory cytokines *Il6*, *Il1b*, and *Tnf* compared to Cre<sup>-</sup> littermate controls at 3 dpf.

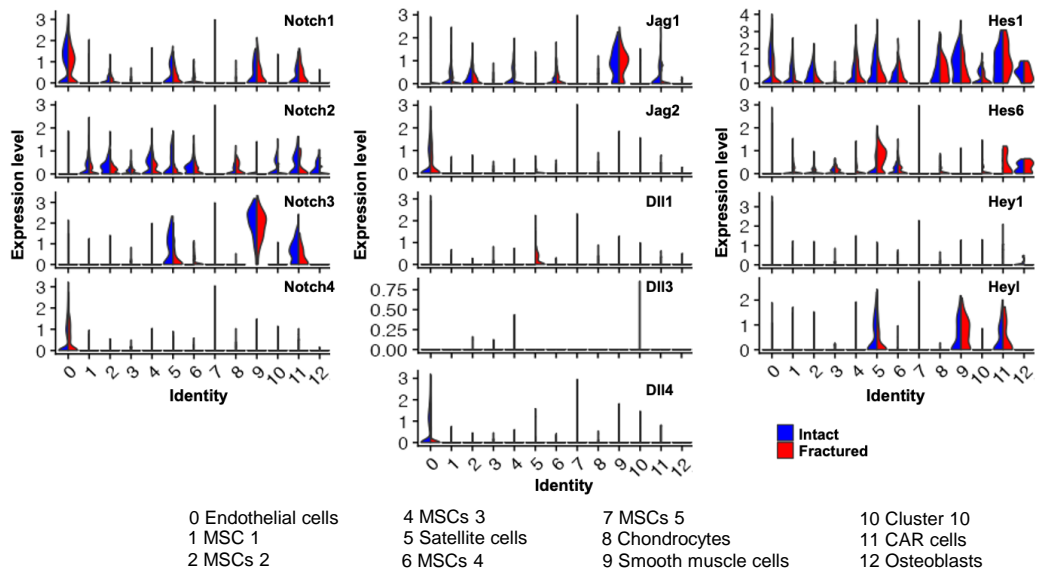

**Supplemental Figure 5. Notch signaling genes in the periosteum.** Violin plots presenting expression of Notch receptors, ligands, and the most highly expressed downstream signaling genes of integrated samples from intact and fractured Cre- groups.

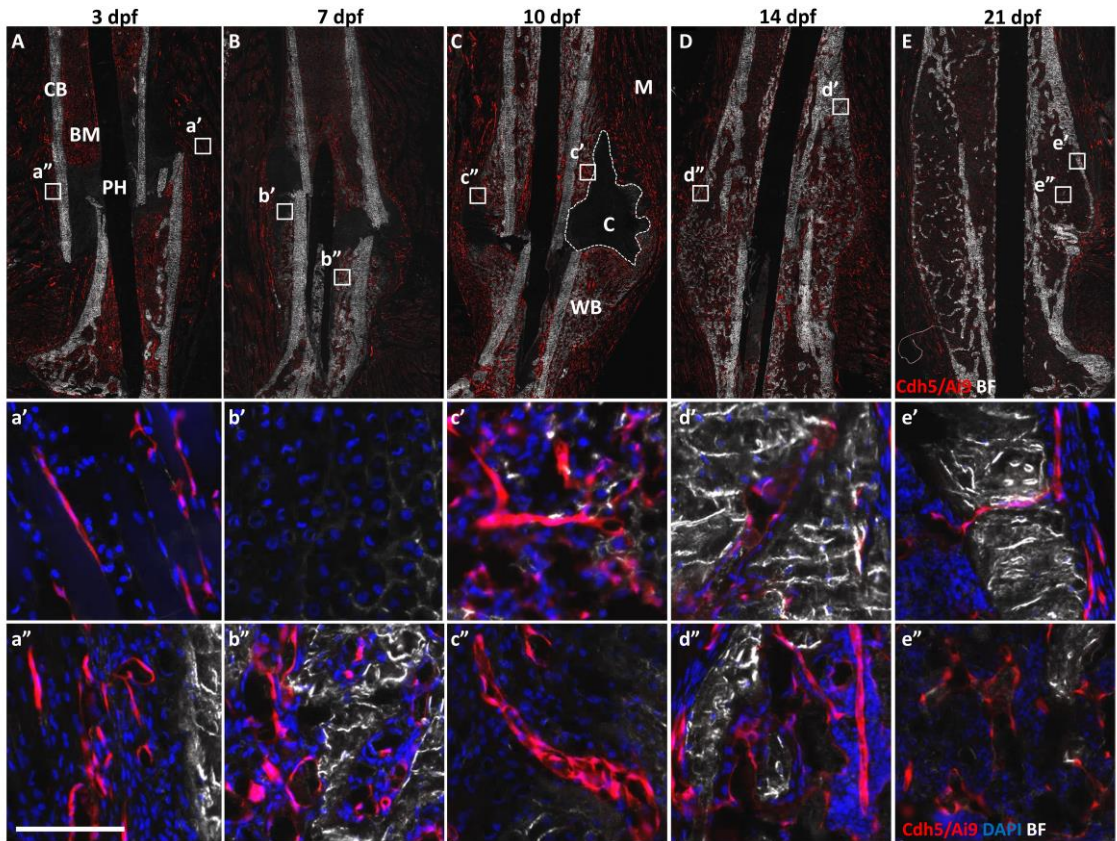

**Supplemental Figure 6. Lineage tracing of Cdh5 ECs within the callus tissue.** Cdh5CreER/Ai9 mice were injected with tamoxifen on the day of fracture to induce tdTomato expression and evaluate labeled ECs during fracture healing at 3, 7, 10, 14, and 21 dpf. Images present sections of the fractured femurs, with boxes indicating magnified images of callus and muscle tissue with labeled Cdh5/Ai9 ECs. Dashed line is presenting cartilage area with lack of Cdh5ER/Ai9 cells. CB-cortical bone, BM-bone marrow, PH-pin hole, WB-woven bone. Scale = 100  $\mu$ m

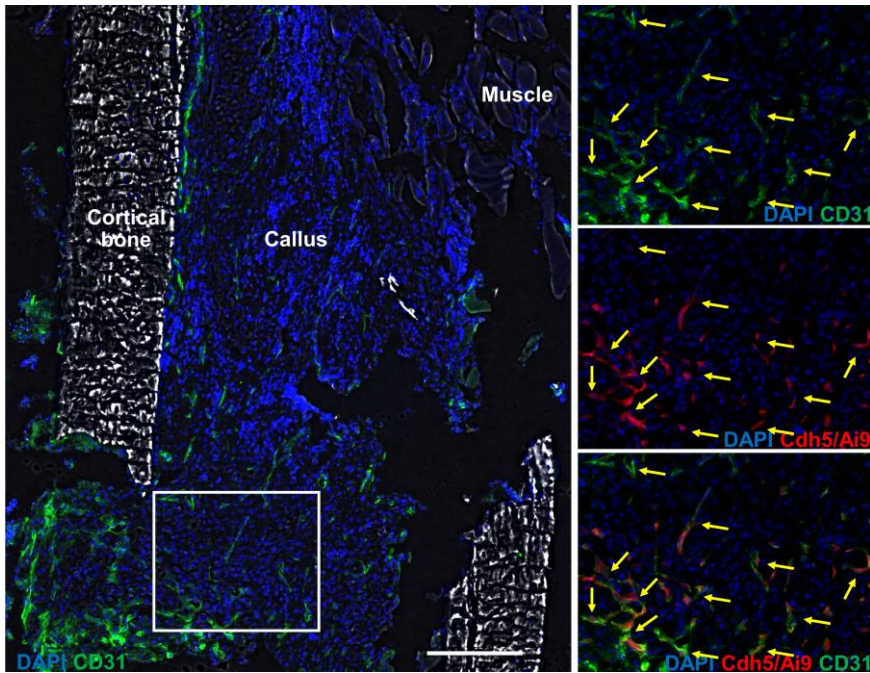

**Supplemental Figure 7. Cdh5/Ai9 targets CD31<sup>+</sup> cells.** Cdh5CreER/Ai9 mice were injected with tamoxifen to induce tdTomato expression, and sections of fractured bone were stained for CD31 endothelial marker. tdTomato was co-expressed with CD31 marker, both staining ECs. Scale = 200  $\mu$ m.

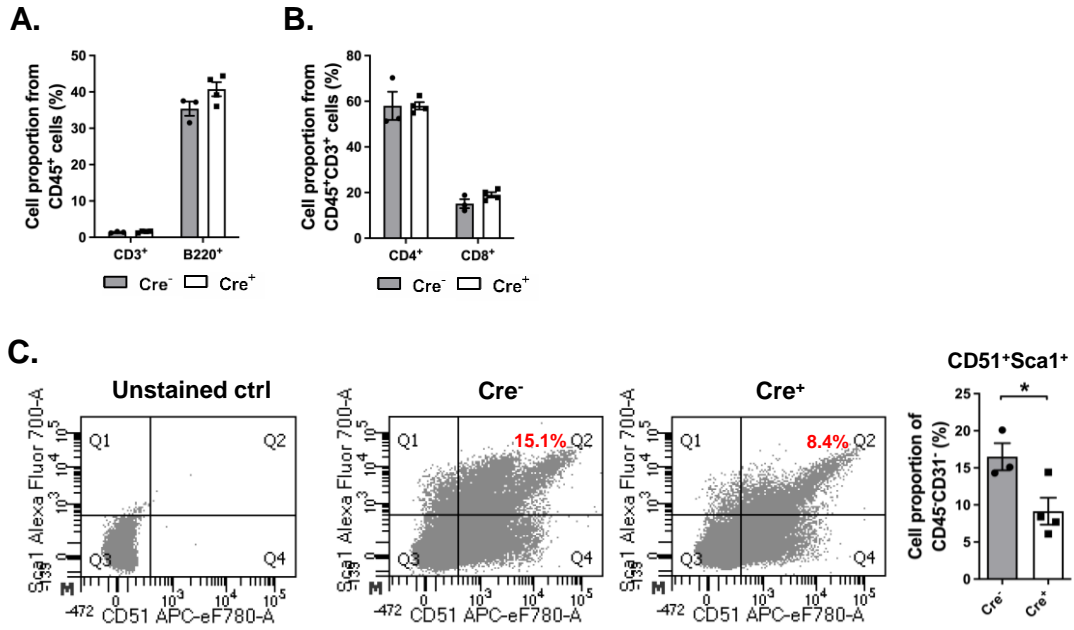

**Supplemental Figure 8. Deletion of *Dll4* affects early callus healing.** (A) To induce *Dll4* deletion, tamoxifen was injected into Cdh5CreER/*Dll4* $\Delta$  animals on the day of fracture and at 2 and 4 dpf. Cdh5Cre<sup>+</sup>ER/*Dll4* $\Delta$  animals did not show changes in T- or B-cell proportions or (B) CD4<sup>+</sup> and CD8<sup>+</sup> cells within the bone marrow 5 days post first tamoxifen injection compared to Cre<sup>-</sup> littermate controls. (C) At 5 dpf, *Dll4* deletion in ECs decreased the proportion of Sca1<sup>+</sup>CD51<sup>+</sup> periosteal cells. Cre<sup>-</sup> n = 3, Cre<sup>+</sup> n = 4, Unpaired t test. \**P* < 0.05.



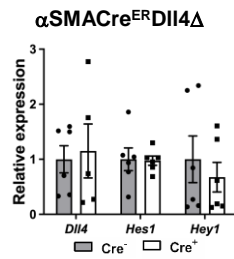

**Supplemental Figure 9. Deletion of *Dll4* in osteoprogenitors has no effect on total callus *Dll4* expression.** Deletion of *Dll4* in  $\alpha$ SMACreER/Dll4 $\Delta$  mice was induced by injecting tamoxifen into Cre<sup>-</sup> and Cre<sup>+</sup> mice at 0, 2, and 4 dpf and evaluating the callus tissue on day 7 for expression of *Dll4* and the Notch downstream signaling genes *Hes1* and *Hey1*. n = 6, Unpaired t test.

**Supplemental Table 1. List of pathways with significant cell-cell interactions**

|     | Control intact | Control fractured | NICD1 intact  | NICD1 fractured |
|-----|----------------|-------------------|---------------|-----------------|
| 1   |                | ACTIVIN           | ACTIVIN       | ACTIVIN         |
| 2   |                | Adenosine         |               | Adenosine       |
| 3   | ADGRA          | ADGRA             | ADGRA         | ADGRA           |
| 4   | ADGRE          | ADGRE             | ADGRE         | ADGRE           |
| 5   | ADGRG          | ADGRG             | ADGRG         | ADGRG           |
| 6   | ADGRL          | ADGRL             | ADGRL         | ADGRL           |
| 7   | ADIPONECTIN    | ADIPONECTIN       | ADIPONECTIN   | ADIPONECTIN     |
| 8   | AGRN           | AGRN              | AGRN          | AGRN            |
| 9   | AGT            | AGT               | AGT           | AGT             |
| 10  | ANGPT          | ANGPT             | ANGPT         | ANGPT           |
| 11  | ANGPTL         | ANGPTL            | ANGPTL        | ANGPTL          |
| 12  |                | APELIN            |               |                 |
| 13  | APP            | APP               | APP           | APP             |
| 14  | BMP            | BMP               | BMP           | BMP             |
| 15  | BSP            | BSP               | BSP           | BSP             |
| 16  | CADM           | CADM              | CADM          | CADM            |
| 17  | CCL            | CCL               | CCL           | CCL             |
| 18  |                | CD39              |               | CD39            |
| 19  | CDH            | CDH               | CDH           | CDH             |
| 20  |                |                   |               |                 |
| 21  | CDH5           | CDH5              | CDH5          | CDH5            |
| 22  | CEACAM         | CEACAM            | CEACAM        | CEACAM          |
| 23  |                | CHAD              |               | CHAD            |
| 24  | CHEMERIN       | CHEMERIN          | CHEMERIN      | CHEMERIN        |
| 25  | Cholesterol    | Cholesterol       | Cholesterol   | Cholesterol     |
| 26  | CLDN           | CLDN              | CLDN          |                 |
| 27  | COLLAGEN       | COLLAGEN          | COLLAGEN      | COLLAGEN        |
| 28  |                | CSPG4             |               | CSPG4           |
| 29  | CXCL           | CXCL              | CXCL          | CXCL            |
| 30  | CypA           | CypA              | CypA          | CypA            |
| 31  |                | Desmosterol       | CysLTs        |                 |
| 32  |                | DHEA              |               |                 |
| 33  | DHEAS          | DHEAS             | DHEAS         | DHEAS           |
| 34  | DHT            | DHT               | DHT           | DHT             |
| 35  | DMP1           | DMP1              | DMP1          | DMP1            |
| 36  | EDN            | EDN               | EDN           | EDN             |
| 37  | EGF            | EGF               | EGF           | EGF             |
| 38  | EPHA           | EPHA              | EPHA          | EPHA            |
| 39  | EPHB           | EPHB              | EPHB          | EPHB            |
| 40  | ESAM           | ESAM              | ESAM          | ESAM            |
| 41  | FGF            | FGF               | FGF           | FGF             |
| 42  | FLRT           | FLRT              | FLRT          | FLRT            |
| 43  | FN1            | FN1               | FN1           | FN1             |
| 44  | GALANIN        | GALANIN           | GALANIN       | GALANIN         |
| 45  | GALECTIN       | GALECTIN          | GALECTIN      | GALECTIN        |
| 46  | GAP            | GAP               | GAP           | GAP             |
| 47  | GAS            | GAS               | GAS           | GAS             |
| 48  | GDF            | GDF               | GDF           | GDF             |
| 49  | Glutamate      | Glutamate         | Glutamate     | Glutamate       |
| 50  | GRN            | GRN               | GRN           | GRN             |
| 51  |                | HGF               | HGF           | HGF             |
| 52  | HSPG           | HSPG              | HSPG          | HSPG            |
| 53  | IGF            | IGF               | IGF           | IGF             |
| 54  | IGFBP          | IGFBP             | IGFBP         | IGFBP           |
| 55  |                | IL6               |               |                 |
| 56  | JAM            | JAM               | JAM           | JAM             |
| 57  |                | KIT               |               | KIT             |
| 58  | LAMININ        | LAMININ           | LAMININ       | LAMININ         |
| 59  |                | LIFR              |               |                 |
| 60  | MIF            | MIF               | MIF           | MIF             |
| 61  | MK             | MK                | MK            | MK              |
| 62  | MMP            | MMP               | MMP           | MMP             |
| 63  | MPZ            | MPZ               | MPZ           | MPZ             |
| 64  | NCAM           | NCAM              | NCAM          | NCAM            |
| 65  | hcWNT          | hcWNT             | hcWNT         | hcWNT           |
| 66  | NECTIN         | NECTIN            | NECTIN        | NECTIN          |
| 67  | NEGR           | NEGR              | NEGR          |                 |
| 68  | Netrin         | Netrin            | Netrin        | Netrin          |
| 69  | NOTCH          | NOTCH             | NOTCH         | NOTCH           |
| 70  |                | NT                |               |                 |
| 71  | PCDH           | PCDH              | PCDH          | PCDH            |
| 72  | PDGF           | PDGF              | PDGF          | PDGF            |
| 73  | PECAM1         | PECAM1            | PECAM1        | PECAM1          |
| 74  | PECAM2         | PECAM2            | PECAM2        | PECAM2          |
| 75  | PERIOSTIN      | PERIOSTIN         | PERIOSTIN     | PERIOSTIN       |
| 76  | PLAU           | PLAU              | PLAU          | PLAU            |
| 77  | PROS           | PROS              | PROS          | PROS            |
| 78  | Prostaglandin  | Prostaglandin     | Prostaglandin | Prostaglandin   |
| 79  | PTN            | PTN               | PTN           | PTN             |
| 80  | PTPR           | PTPR              |               | PTPR            |
| 81  | PTPRM          | PTPRM             | PTPRM         | PTPRM           |
| 82  | RA             | RA                | RA            | RA              |
| 83  | RANKL          | RANKL             | RANKL         | RANKL           |
| 84  | SEMA3          | SEMA3             | SEMA3         | SEMA3           |
| 85  | SEMA4          | SEMA4             | SEMA4         | SEMA4           |
| 86  | SEMA5          | SEMA5             | SEMA5         | SEMA5           |
| 87  | SEMA6          | SEMA6             | SEMA6         | SEMA6           |
| 88  | SEMA7          | SEMA7             | SEMA7         | SEMA7           |
| 89  | SLIT           | SLIT              | SLIT          | SLIT            |
| 90  |                | SLITRK            |               | SLITRK          |
| 91  | SPP1           | SPP1              | SPP1          | SPP1            |
| 92  | TENASCIN       | TENASCIN          | TENASCIN      | TENASCIN        |
| 93  | Testosterone   | Testosterone      | Testosterone  | Testosterone    |
| 94  | TGFb           | TGFb              | TGFb          | TGFb            |
| 95  | THBS           | THBS              | THBS          | THBS            |
| 96  | THY1           | THY1              | THY1          | THY1            |
| 97  |                | TRAIL             |               |                 |
| 98  | TWEAK          | TWEAK             | TWEAK         | TWEAK           |
| 99  | UNC5           | UNC5              | UNC5          | UNC5            |
| 100 | VCAM           | VCAM              | VCAM          | VCAM            |
| 101 | VEGF           | VEGF              | VEGF          | VEGF            |
| 102 | VISFATIN       | VISFATIN          | VISFATIN      | VISFATIN        |
| 103 | VTN            | VTN               | VTN           | VTN             |
| 104 | VWF            | VWF               | VWF           | VWF             |
| 105 | WNT            | WNT               | WNT           | WNT             |

n = pathways 89 103 94 95  
n = shared pathways 86 86 86 86  
Proportion of shared pathways 96.63 83.50 91.49 90.53

**Supplemental Table 2. List of used antibodies and streptavidin**

| <b>Antibody</b>             | <b>Clone</b> | <b>Catalog number</b> | <b>Company</b> | <b>Dilution</b> |
|-----------------------------|--------------|-----------------------|----------------|-----------------|
| CD45 eFluor 450             | 30-F11       | 48-0451               | eBioscience    | 1:400           |
| Ter119 APC                  | Ter-119      | 17-5921               | eBioscience    | 1:400           |
| Ter119 eFluor 450           | TER-119      | 48-5921               | eBioscience    | 1:402           |
| CD51 biotin                 | RMV-7        | 13-0512               | eBioscience    | 1:100           |
| Sca1 Alexa fluor 700        | D7           | 56-5981               | eBioscience    | 1:100           |
| CD90.2 BV605                | 53-2.1       | 740334                | BD Bioscience  | 1:100           |
| Dll4 APC                    | HMD4-1       | 130813                | BioLegend      | 1:100           |
| CD31 FITC                   | PECAM-1      | 11-0311               | eBioscience    | 1:200           |
| CD140a PE Cy7               | APA5         | 25-1401               | eBioscience    | 1:100           |
| CD3 BV605                   | 145-2C11     | 100351                | eBioscience    | 1:200           |
| CD4 PE                      | GK1.5        | 12-0041               | eBioscience    | 1:200           |
| CD8 biotin                  | 53-6.7       | 13-0081               | eBioscience    | 1:400           |
| CD45 APC                    | 30-F11       | 17-0451               | eBioscience    | 1:400           |
| B220 BV711                  | 103255       | 103255                | BioLegend      | 1:200           |
| Streptavidin APC eFluor 780 |              | 47-4317               | eBioscience    | 1:400           |
